# Supplementary material for: Facile preparation of polyoxometalate nanoparticles via a solid-state chemical reaction for aerobic oxidative desulfurization catalysis
Source: Royal Society of Chemistry journal article supplement (doi:10.1039/d1dt01695d), 2021-01-01
Supplement: d1dt01695d1.pdf [file d1dt01695d1.pdf]

## **Supporting information**

### **Facile preparation of a polyoxometalate nanoparticle via solid-state chemical reaction for aerobic oxidation desulfurization catalysis**

Hang Yu, Wenwen Bu, Zijia Wang, Zhuoyue Zhao, Mehwish Jadoon and Xiaohong Wang\*

Key Laboratory of Polyoxometalate and Reticular Material Chemistry of Ministry of Education,

Faculty of Chemistry, Northeast Normal University, Changchun 130024, P. R. China, Tel.:

0086-431-85098531; Fax: 0086-431-85099759, E-mail address: wangxh665@nenu.edu.cn

## Figure Caption

**Table S1** The comparison between various POM catalysts under aerobic conditions.

**Table S2** Results of elemental analysis of catalysts (theoretical calculated values in brackets).

**Fig. S1** FTIR spectra of  $(\text{NH}_4)_5\text{H}_6\text{PMo}_4\text{V}_8\text{O}_{40}$ ,  $\text{AgPMo}_4\text{V}_8$  powder and  $\text{AgPMo}_4\text{V}_8$  nanoparticle.

**Fig. S2** The XRD patterns of  $(\text{NH}_4)_5\text{H}_6\text{PMo}_4\text{V}_8\text{O}_{40}$  and  $\text{AgPMo}_4\text{V}_8$  nanoparticle.

**Fig. S3** The  $^{31}\text{P}$  MAS NMR spectra of  $(\text{NH}_4)_5\text{H}_6\text{PMo}_4\text{V}_8\text{O}_{40}$ ,  $\text{AgPMo}_4\text{V}_8$  powder and  $\text{AgPMo}_4\text{V}_8$  nanoparticle.

**Fig. S4** Cyclic voltammograms of  $\text{AgPMo}_4\text{V}_8$  nanoparticle and  $\text{AgPMo}_4\text{V}_8$  powder.

**Fig. S5** The SEM image of  $\text{AgPMo}_4\text{V}_8$  powder.

**Fig. S6** XPS spectra of  $\text{AgPMo}_4\text{V}_8$  powder (**a**); spectra of V2p elements (**b**) and Ag3d elements (**c**) of  $\text{AgPMo}_4\text{V}_8$  powder.

**Fig. S7** Cyclic voltammograms of  $\text{AgPMo}_4\text{V}_8$  nanoparticle in nitrogen and oxygen atmosphere.

**Fig. S8** DR-UV spectra of  $\text{AgPMo}_4\text{V}_8$  nanoparticle in  $\text{N}_2$  and in  $\text{O}_2$ .

**Fig. S9** The gasoline before the reaction (left) and after (right) treatment.

**Fig. S10** UV spectrum of reaction mixture after separating catalyst.

**Fig. S11** The dissolving test of  $\text{AgPMo}_4\text{V}_8$  nanoparticle in AODS of DBT.

**Fig. S12** The IR, XRD, SEM and XPS of  $\text{AgPMo}_4\text{V}_8$  nanoparticle before and after the reaction.

**Fig. S13** The precipitation of  $\text{DBTO}_2$  after aerobic oxidative treatment.

**Fig. S14** XPS spectra of V2p elements (**a**) and Ag3d elements (**b**) of  $\text{AgPMo}_4\text{V}_8$  nanoparticle after reaction.

## Materials

All chemicals and solvents used in this work were AR grade or better without further purification. For oxidation desulfurization, thiophene, DBT, BT and 4,6-DMDBT were prepared from the stock solution.

## Physical measurements

IR spectra ( $4000\text{--}400\text{ cm}^{-1}$ ) were recorded in KBr disks on a Nicolet Magna 560 IR spectrometer. UV-Vis spectra (200–800 nm) were recorded on a Cary 500 UV-Vis-NIR spectrophotometer. DR-UV-Vis spectra (200–800 nm) were obtained on a UV-2600 UV-Vis spectrophotometer (Shimadzu). The UV-visible spectra were recorded on T1810. XPS were recorded on an Escalab-MK II photoelectronic spectrometer with Al K $\alpha$  (1200 eV). Scanning electron microscopy (SEM) and energy-dispersive X-ray (EDAX) spectroscopy were performed using a XL30 ESEM FEG at 25 kV (PhilipsXL-30). EDAX was performed to take into account of the P, V, Mo, C, N, Ag and O elements. Elemental analysis was carried out using a Leeman Plasma Spec (I) ICP-ES and a P-E 2400 CHN elemental analyzer. The XRD patterns of the samples were collected on a Japan Rigaku Dmax 2000 X-ray diffractometer with Cu K $\alpha$  radiation ( $\lambda = 0.154178\text{ nm}$ ). The Cyclic voltammetry curve was performed using Shanghai Chenhua Instrument Co., Ltd. CHI600E electrochemical Workstation. The particle-size distribution was to use Zetasizer Nano ZSE test analysis. The BET surface area was carried out using American Mike ASAP2020M gas adsorption analyzer and AUTOSORB-IQ-MPXR gas adsorption analyzer. The  $^{31}\text{P}$  MAS NMR spectrum of  $(\text{NH}_4)_5\text{H}_6\text{PMo}_4\text{V}_8\text{O}_{40}$ ,  $\text{AgPMo}_4\text{V}_8$  powder and  $\text{AgPMo}_4\text{V}_8$  nanoparticle were obtained using a Bruker AVANCE III spectrometer at 400 MHz. The identification and quantification of DBT, 4,6-

DMDBT, BT and thiophene in decalin were performed by Gas Chromatography (GC). The sulfur content in real diesel was tested by ICP-AES (ICAP 6300).

**Table S1** The comparison between various POM catalysts under aerobic conditions.

| Catalyst and usage                                                                                                           | Solvent | Substrate                   | Oxidant      | T (°C)   | Reaction time (h)  | Con. (%)                  |
|------------------------------------------------------------------------------------------------------------------------------|---------|-----------------------------|--------------|----------|--------------------|---------------------------|
| $[\text{C}_8\text{H}_{17}\text{N}(\text{CH}_3)_3]_3\text{H}_3\text{V}_{10}\text{O}_{28}$<br>40 mg                            | Decalin | DBT                         | $\text{O}_2$ | 97       | 7                  | 100                       |
| $\text{M}_2(\text{PcTN})_2/\text{W-HZSM-5}$<br>(M = Fe, Co, Ni, Cu, Zn and Mn)<br>100 mg                                     | -       | T<br>BT<br>DBT              | $\text{O}_2$ | 60       | 3                  | > 85                      |
| $[(\text{C}_{18}\text{H}_{37})_2\text{N}(\text{CH}_3)_2]_3\text{Co}(\text{OH})_6\text{Mo}_6\text{O}_{18}$<br>11 mg           | Decalin | 4,6-DMDBT<br>DBT<br>BT      | $\text{O}_2$ | 80       | 5<br>7<br>12       | 100<br>100<br>65          |
| $[\text{C}_8\text{H}_{17}\text{N}(\text{CH}_3)_3]_3\text{HIV}_9\text{O}_{28}$<br>40 mg                                       | Decalin | DBT<br>4,6-DMDBT            | $\text{O}_2$ | 90<br>90 | 6<br>7             | 100<br>100                |
| $[\text{Cu}_2(\text{BTC})_{4/3}(\text{H}_2\text{O})_2]_6[\text{H}_3\text{PV}_2\text{Mo}_{10}\text{O}_{40}]$<br>44 mg         | Decalin | DBT                         | $\text{O}_2$ | 80       | 1.5                | 100                       |
| $(\text{NH}_4)_5\text{H}_6\text{PV}_8\text{Mo}_4\text{O}_{40}$<br>20 mg                                                      | Decalin | DBT<br>4,6-DMDBT<br>BT<br>T | $\text{O}_2$ | 100      | 6<br>6<br>11<br>12 | 100<br>100<br>100<br>97   |
| $\text{IMo}_6@\text{iPAF-1}$<br>10 mg                                                                                        | Decalin | DBT<br>4,6-DMDBT<br>BT<br>T | $\text{O}_2$ | 90       | 5<br>5<br>7<br>10  | 100<br>100<br>100<br>97.6 |
| $[\text{PyPS}]_3\text{Co}(\text{OH})_6\text{Mo}_6\text{O}_{18}$ and<br>Benzenesulfonic acid and polyethylene glycol<br>20 mg | Decalin | DBT<br>4,6-DMDBT<br>BT      | $\text{O}_2$ | 60       | 4<br>6<br>8        | 100<br>100<br>100         |
| $\text{Na}_3\text{Fe}(\text{OH})_6\text{Mo}_6\text{O}_{18}$ and<br>Benzenesulfonic acid and polyethylene glycol<br>20 mg     | Decalin | DBT<br>4,6-DMDBT<br>BT      | $\text{O}_2$ | 60       | 3<br>3<br>6        | 99<br>99<br>95            |
| $\text{Na}_3\text{H}_6\text{CrMo}_6\text{O}_{24}$ and PEG<br>(polyethylene glycol)/SSA (5-sulfosalicylic acid)<br>20 mg      | Decalin | DBT<br>4,6-DMDBT            | $\text{O}_2$ | 60       | 2<br>3             | 100<br>100                |
| $(\text{NH}_4)_3\text{Co}(\text{OH})_6\text{Mo}_6\text{O}_{18}$ and p-toluenesulfonic acid<br>20 mg                          | Decalin | DBT                         | $\text{O}_2$ | 70       | 0.5                | 100                       |
| $\text{Ag}_6(\text{NH}_4)_5\text{PMo}_4\text{V}_8\text{O}_{40}$<br>20 mg                                                     | Decalin | DBT<br>4,6-DMDBT<br>BT<br>T | $\text{O}_2$ | 100      | 3.5<br>2<br>6<br>8 | 100<br>100<br>100<br>97   |

**Table S2** Results of elemental analysis of catalysts (theoretical calculated values in brackets).

| Catalysts                                                       | Elementary results (calculated values in parenthesis)/% |        |        |        |         |         |
|-----------------------------------------------------------------|---------------------------------------------------------|--------|--------|--------|---------|---------|
|                                                                 | Ag                                                      | N      | H      | P      | Mo      | V       |
| $\text{Ag}_6(\text{NH}_4)_5\text{PMo}_4\text{V}_8\text{O}_{40}$ | 29.43                                                   | 3.18   | 0.92   | 1.41   | 17.45   | 18.53   |
| powder                                                          | (29.02)                                                 | (3.58) | (0.88) | (1.32) | (17.33) | (18.55) |
| $\text{Ag}_6(\text{NH}_4)_5\text{PMo}_4\text{V}_8\text{O}_{40}$ | 29.42                                                   | 3.17   | 0.91   | 1.42   | 17.54   | 18.53   |
| nanoparticle                                                    | (29.02)                                                 | (3.58) | (0.88) | (1.32) | (17.33) | (18.55) |

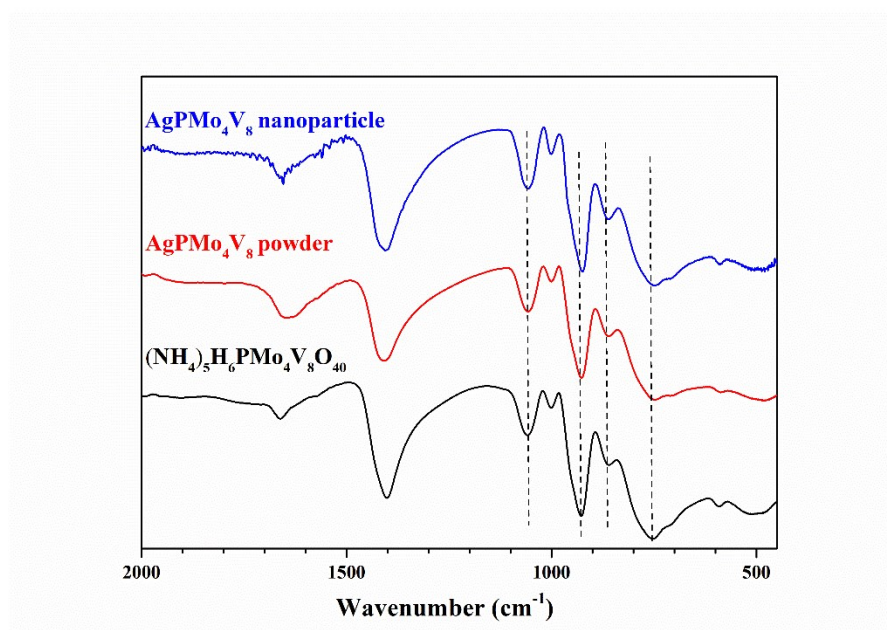

**Fig. S1** FTIR spectra of (NH<sub>4</sub>)<sub>5</sub>H<sub>6</sub>PMo<sub>4</sub>V<sub>8</sub>O<sub>40</sub>, AgPMo<sub>4</sub>V<sub>8</sub> powder and AgPMo<sub>4</sub>V<sub>8</sub> nanoparticle.

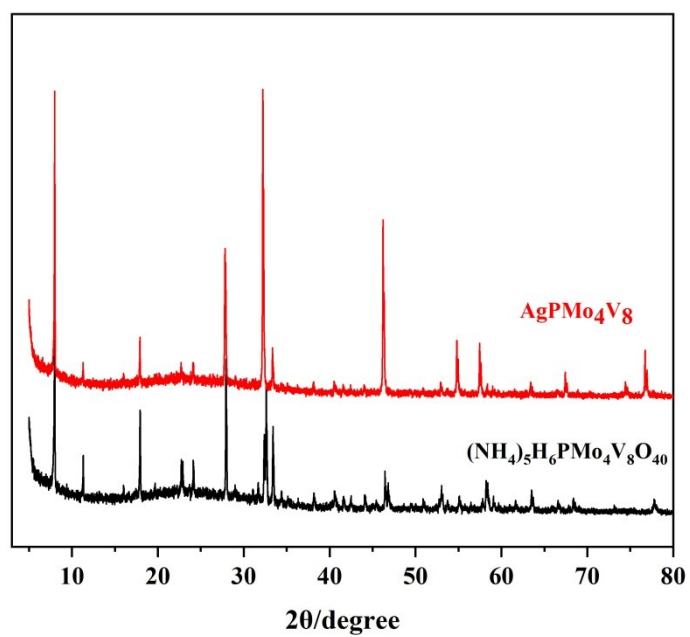

**Fig. S2** The XRD patterns of (NH<sub>4</sub>)<sub>5</sub>H<sub>6</sub>PMo<sub>4</sub>V<sub>8</sub>O<sub>40</sub> and AgPMo<sub>4</sub>V<sub>8</sub> nanoparticle.

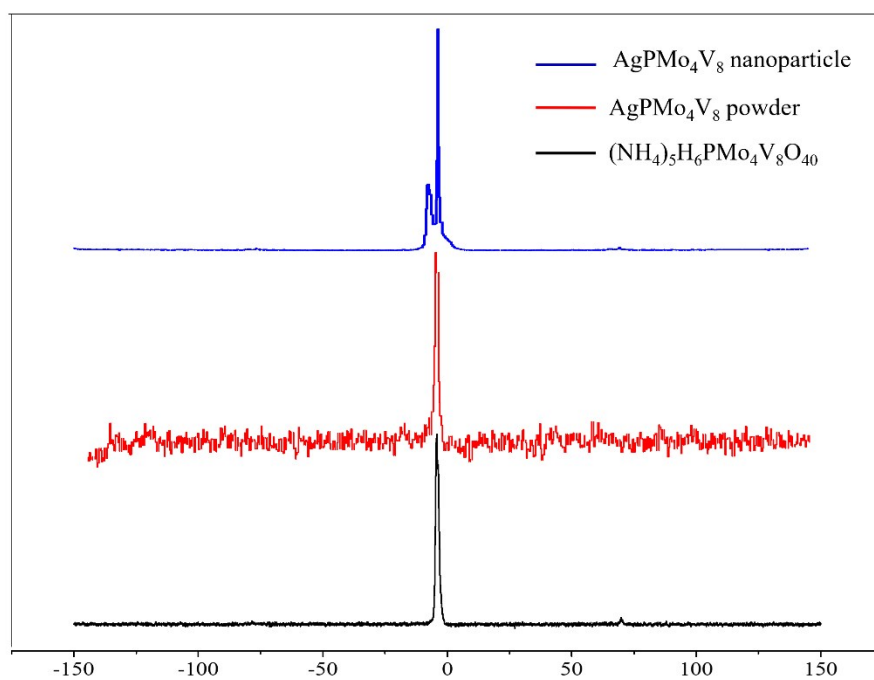

**Fig. S3** The  $^{31}\text{P}$  MAS NMR spectra of  $(\text{NH}_4)_5\text{H}_6\text{PMo}_4\text{V}_8\text{O}_{40}$ ,  $\text{AgPMo}_4\text{V}_8$  powder and  $\text{AgPMo}_4\text{V}_8$  nanoparticle.

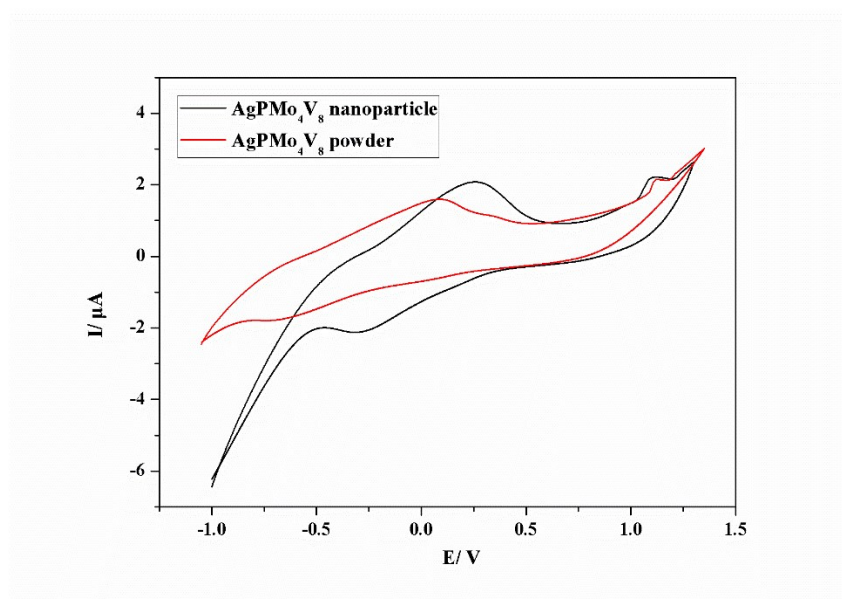

**Fig. S4** Cyclic voltammograms of  $\text{AgPMo}_4\text{V}_8$  nanoparticle and  $\text{AgPMo}_4\text{V}_8$  powder.

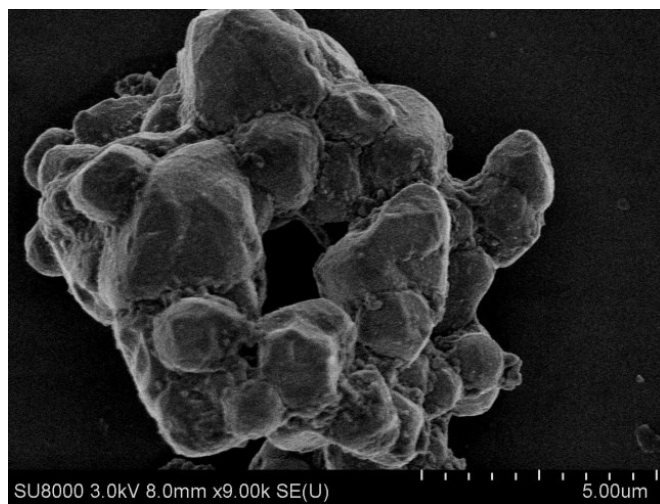

**Fig. S5** The SEM image of AgPMo<sub>4</sub>V<sub>8</sub> powder.

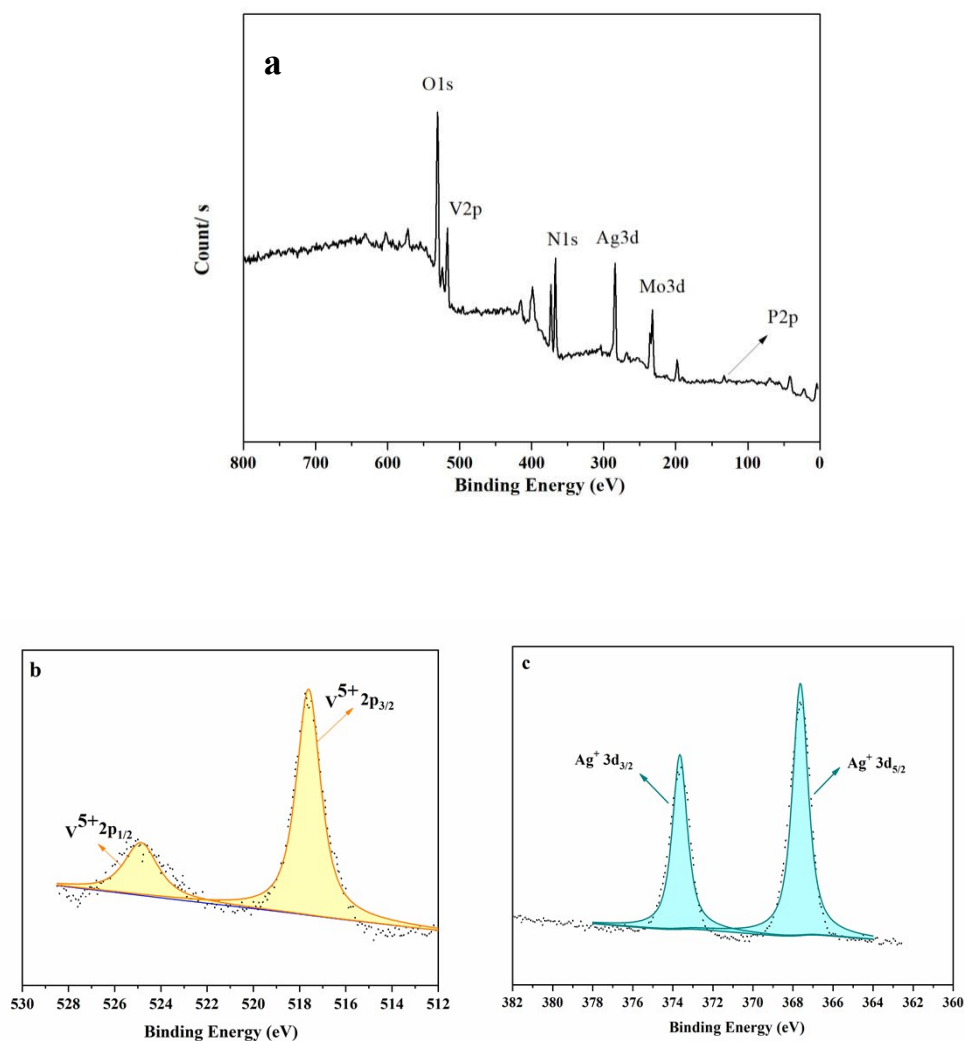

**Fig. S6** XPS spectra of  $\text{AgPMo}_4\text{V}_8$  powder (a); spectra of V2p elements (b) and Ag3d elements (c) of  $\text{AgPMo}_4\text{V}_8$  powder.

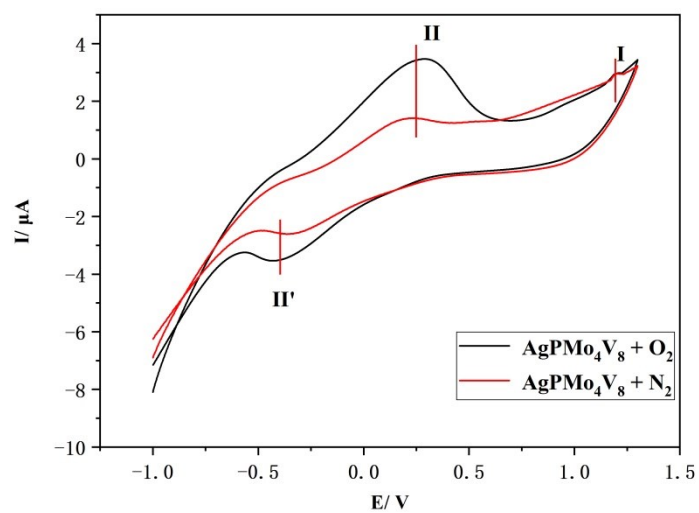

**Fig. S7** Cyclic voltammograms of AgPMo<sub>4</sub>V<sub>8</sub> nanoparticle in nitrogen and oxygen atmosphere.

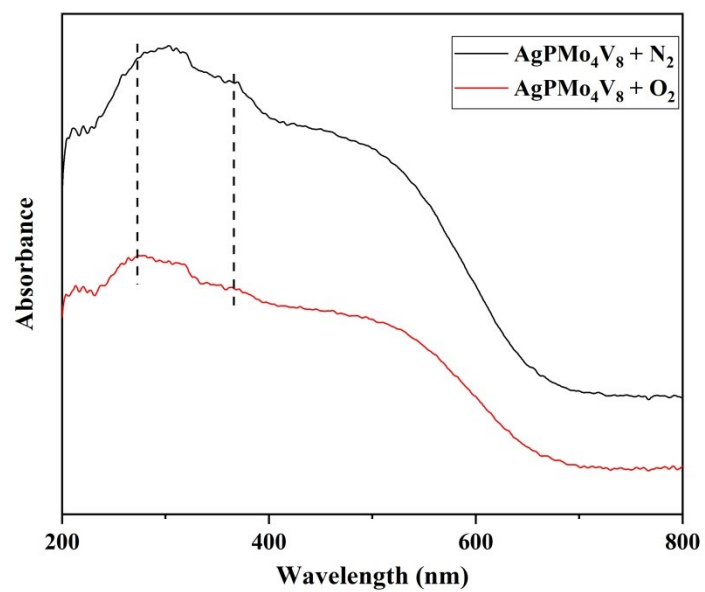

**Fig. S8** DR-UV spectra of AgPMo<sub>4</sub>V<sub>8</sub> nanoparticle in N<sub>2</sub> and in O<sub>2</sub>.

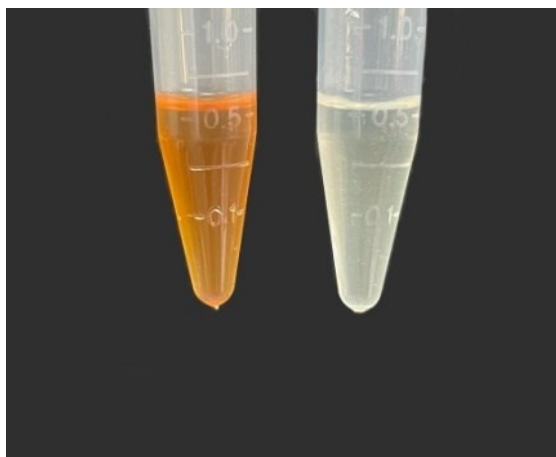

**Fig. S9** The gasoline before the reaction (left) and after (right) treatment.

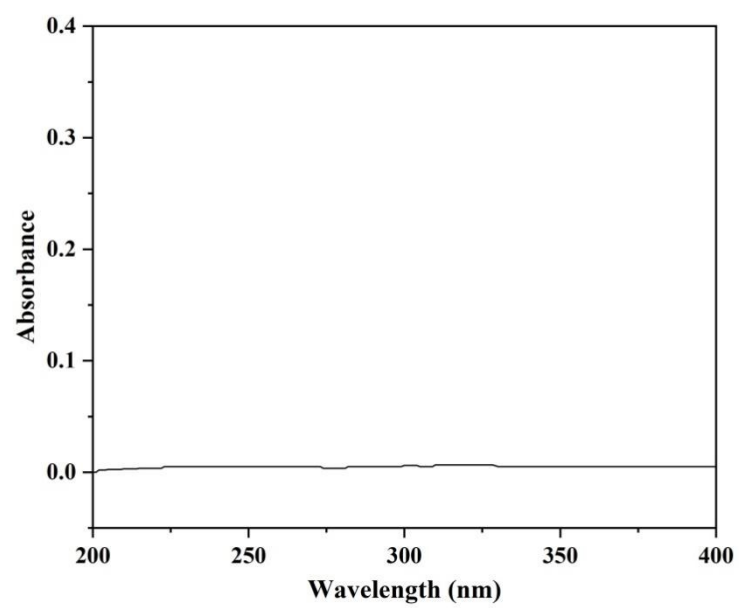

**Fig. S10** Uv spectrum of reaction mixture after separating catalyst.

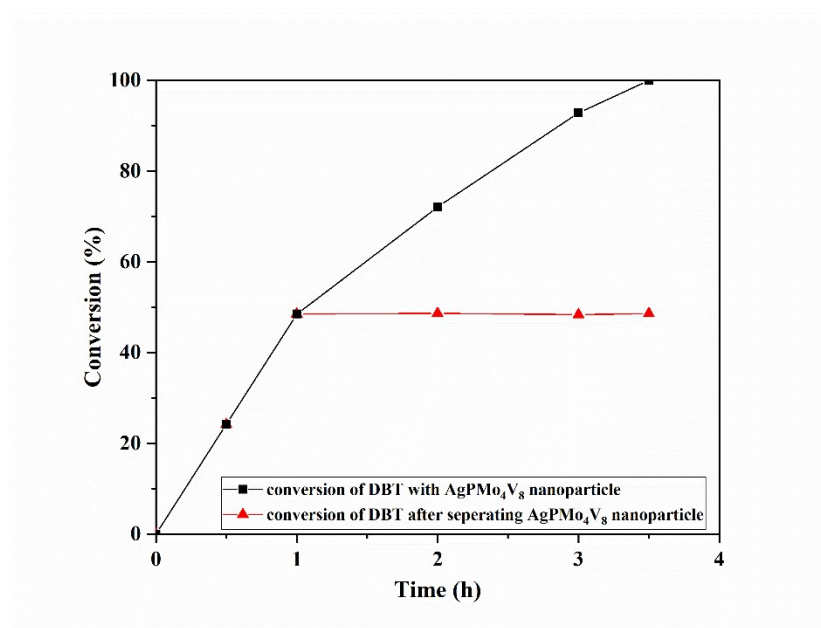

**Fig. S11** The dissolving test of AgPMo<sub>4</sub>V<sub>8</sub> nanoparticle in AODS of DBT.

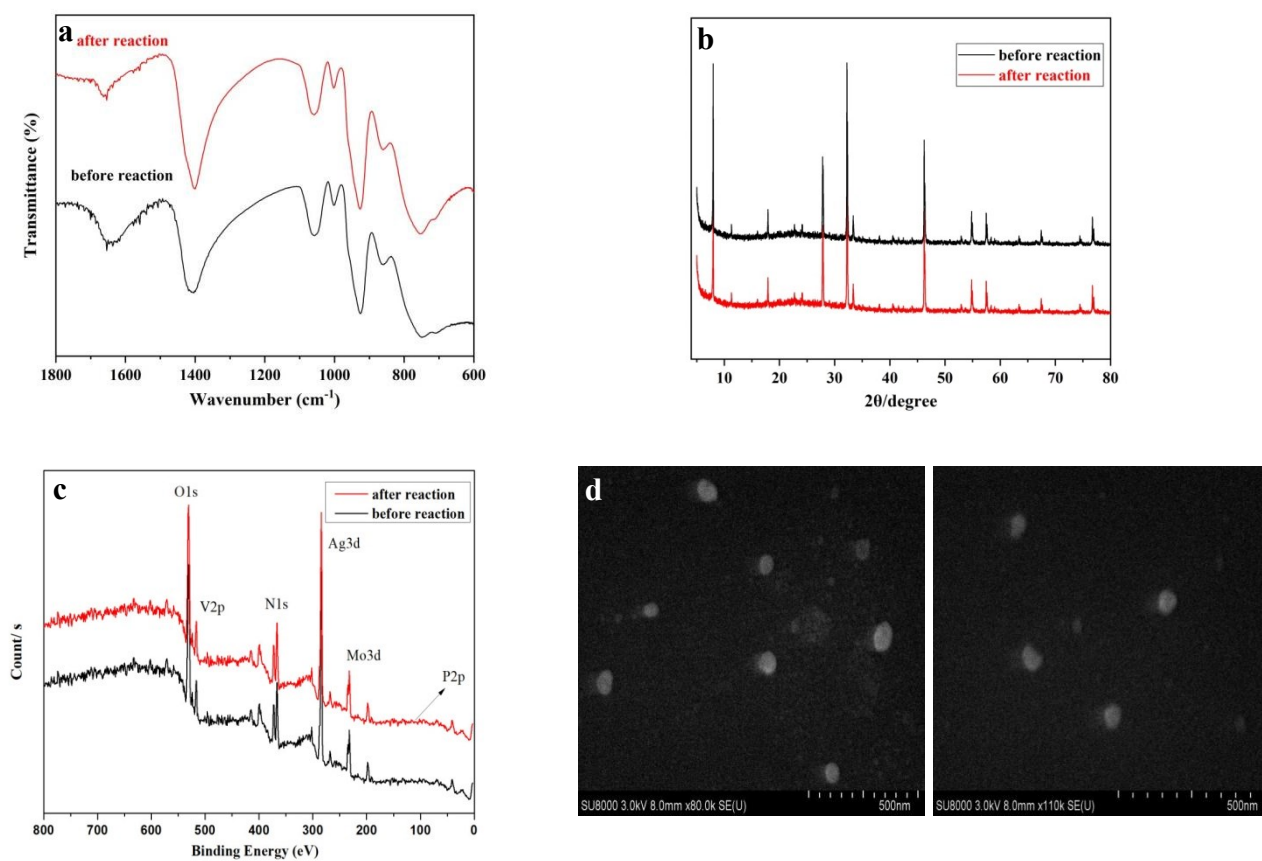

**Fig. S12** The IR (a), XRD (b), XPS (c) and SEM (d) of AgPMo<sub>4</sub>V<sub>8</sub> nanoparticle before and after the reaction.

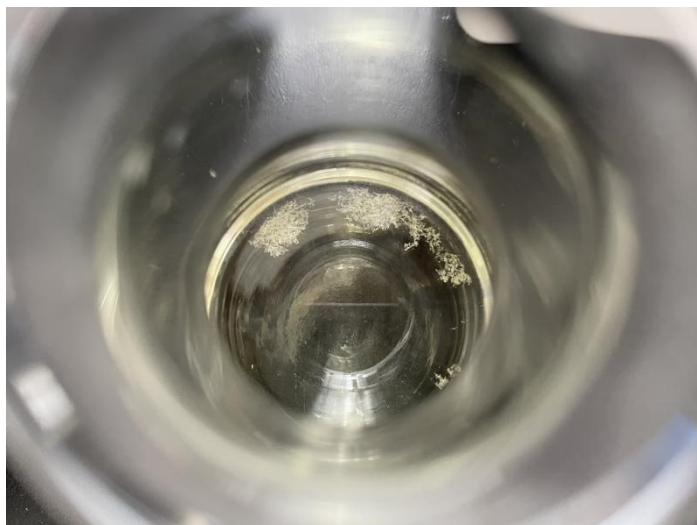

**Fig. S13** The precipitation of DBTO<sub>2</sub> after aerobic oxidative treatment.

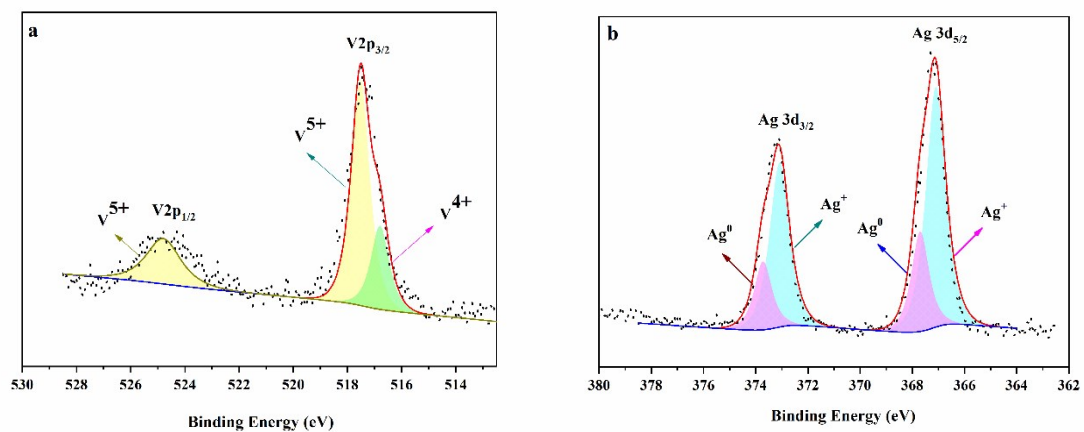

**Fig. S14** XPS spectra of V2p elements **(a)** and Ag3d elements **(b)** of AgPMo<sub>4</sub>V<sub>8</sub> nanoparticle after reaction.
